# Supplementary material for: Soluble CD40L is associated with increased oxidative burst and neutrophil extracellular trap release in Behçet’s disease
Source: Springer Nature journal article supplement (doi:10.1186/s13075-017-1443-5), 2017-10-19
Supplement: MOESM1 [file 15147012]

**Table S1** – Genes and *primers* evaluated by quantitative real-time PCR.

| <b>Protein (<i>Gene</i>)</b> | <b><i>Primer Foward</i></b>         | <b><i>Primer Reverse</i></b>        |
|------------------------------|-------------------------------------|-------------------------------------|
| p22 ( <i>CYBA</i> )          | 5'-agg aat tac tat gtt cgg gcc g-3' | 5'-cag tag gta gat gcc gct cg-3'    |
| gp91-phox ( <i>CYBB</i> )    | 5'-aga ctt tgt atg gac ggc cc-3'    | 5'-act cag ggt ttc agc caa gg-3'    |
| p47 ( <i>NCF1</i> )          | 5'-cct ctt tcc agt gca ttt aag g-3' | 5'-gat gtg acg gat gaa ggt gtc-3'   |
| P67 ( <i>NCF2</i> )          | 5'-gag gct acc caa cca gag g-3'     | 5'-aaa tgc cca cct tcc ctt tg-3'    |
| p40 ( <i>NCF4</i> )          | 5'-gat gcc tcc tta ctc cag cc-3'    | 5'-cgt ccc ggt aat tca gag cta t-3' |
| $\beta$ -actin               | 5'- tca ccg agc gcg gct-3'          | 5'-taa tgt cac gca cga ttt ccc-3'   |
