# Supplementary material for: Soluble CD40L is associated with increased oxidative burst and neutrophil extracellular trap release in Behçet’s disease
Source: Springer Nature journal article supplement (doi:10.1186/s13075-017-1443-5), 2017-10-19
Supplement: MOESM2 [file 15147012]

**Table S2** – Plasma levels of 64 cytokines and 13 soluble receptors from active (aBD) and inactive Behçet’s disease (iBD) patients and healthy controls (HC) determined by addressable laser bead immunoassay.

| Cytokines <sup>a</sup><br>(pg/mL) | HC<br>(n=30)                 | iBD<br>(n=31)                | aBD<br>(n=30)              | p-<br>value |
|-----------------------------------|------------------------------|------------------------------|----------------------------|-------------|
| <b>sCD40L</b>                     | 47.45/33.68–26,743.00        | 17,234.00/2,346.00–19,279.00 | 18,288.50/412.58–19,883.00 | <0.01       |
| <b>IL1<math>\alpha</math></b>     | 17.75/12.24–122.95           | 23.81/14.38–147.36           | 20.66/10.59–96.33          | NS          |
| <b>IL1<math>\beta</math></b>      | 2.54/1.54–6.70               | 4.13/1.94–20.50♦             | 0/0–20.33¶                 | <0.01       |
| <b>IL-1Ra</b>                     | 46.87/34.31 – 121.51         | 63.63/47.01 – 297.79*        | 62.00/41.30 – 297.19*      | <0.01       |
| <b>sIL1-RI</b>                    | 29.20/20.72 – 138.72         | 44.32/0 – 213.99             | 35.47/0 – 260.86           | NS          |
| <b>sIL1-RII</b>                   | 5520.64±2532.45¶             | 9369.78±4212.03*♦            | 5823.89±1855.61¶           | <0.01       |
| <b>IL2</b>                        | 3.18/1.94–8.87¶              | 4.27/2.53–25.85*♦            | 2.61/0–29.33¶              | <0.01       |
| <b>sIL2-Ra</b>                    | 991.47±465.06                | 1459.92±818.41               | 1297.84±521.24             | NS          |
| <b>IL3</b>                        | 1.40/0–5.33                  | 1.70/1.38–9.84♦              | 0/0–7.12¶                  | <0.01       |
| <b>IL4</b>                        | 13.80/9.96–353.44            | 20.29/11.67–80.18            | 18.17/8.14–144.49          | NS          |
| <b>sIL4-R</b>                     | 159.86/57.13 – 354.93¶       | 501.85/158.97 – 1512.99*♦    | 203.26/86.16 – 548.21¶     | <0.01       |
| <b>IL5</b>                        | 3.08/1.80–11.02¶             | 4.25/2.24–27.18*♦            | 1.08/0–15.05¶              | <0.01       |
| <b>IL6</b>                        | 4.10/2.59–8.61¶              | 8.51/4.29–137.24*♦           | 5.95/2.38–45.80¶           | <0.01       |
| <b>sIL6-R</b>                     | 10526.05/4593.32 – 27412.50¶ | 18122.82/0 – 200000.76*      | 13179.64/0 – 150969.32     | <0.05       |
| <b>IL7</b>                        | 4.55±2.53¶                   | 9.79±6.56*♦                  | 4.30±3.71¶                 | <0.01       |
| <b>IL8</b>                        | 10.65/2.91–136.50            | 14.20/5.01–57.97             | 18.73/1.31–281.36          | NS          |
| <b>IL9</b>                        | 2.34/1.23–9.81¶              | 3.74/2.42–10.64*♦            | 0.77/0–11.23¶              | <0.01       |
| <b>IL10</b>                       | 9.78/7.48–30.68¶             | 15.98/11.63–358.12*♦         | 10.99/6.24–60.19¶          | <0.01       |
| <b>IL-12p40</b>                   | 17.01±6.58                   | 35.13±15.01*                 | 37.36±20.75*               | <0.01       |
| <b>IL-12p70</b>                   | 9.86/6.39–76.36              | 13.25/8.31–319.10            | 9.98/6.69–256.30           | NS          |
| <b>IL13</b>                       | 4.28/2.77–30.67¶             | 7.40/3.74–43.08*♦            | 4.50/1.28–20.41¶           | <0.01       |
| <b>IL15</b>                       | 6.79±1.92¶                   | 10.41±4.13*♦                 | 7.01±3.30¶                 | <0.01       |
| <b>IL16</b>                       | 51.44±38.06                  | 70.19±35.37                  | 68.83±27.41                | NS          |
| <b>IL17</b>                       | 6.17/2.98–75.56♦             | 7.49/3.42–200.11♦            | 3.92/0–542.35*¶            | <0.01       |
| <b>IL20</b>                       | 26.62/0–181.59♦              | 30.37/0–86.35♦               | 51.49/24.16–88.18*¶        | <0.01       |

| <b>Cytokines<sup>a</sup></b><br><b>(pg/mL)</b> | <b>HC</b><br><b>(n=30)</b> | <b>iBD</b><br><b>(n=31)</b> | <b>aBD</b><br><b>(n=30)</b> | <b>p-value</b> |
|------------------------------------------------|----------------------------|-----------------------------|-----------------------------|----------------|
| <b>IL21</b>                                    | 7.24/5.30–27.80♦           | 7.75/0–146.50♦              | 9.39/7.51–31.76*¶           | <0.01          |
| <b>IL23</b>                                    | 178.00/104.21–629.40       | 177.45/106.82–4275.00       | 197.70/123.78–998.14        | NS             |
| <b>IL28A</b>                                   | 47.10/36.89–469.58         | 51.86/35.10–225.38          | 55.17/42.30–222.10          | NS             |
| <b>IL33</b>                                    | 11.78/0–52.90              | 12.57/0–384.81              | 12.27/0–115.77              | NS             |
| <b>TNF<math>\alpha</math></b>                  | 6.88/3.28 – 17.01          | 14.14/6.00 – 45.36*         | 11.57/0.00 – 45.28*         | <0.01          |
| <b>TNF<math>\beta</math></b>                   | 11.34/8.65–847.32          | 10.94/8.16–71.00            | 9.12/5.22–34.27             | NS             |
| <b>sTNFR1</b>                                  | 761.68±292.31              | 1139.27±414.94*             | 1232.20±414.36*             | <0.01          |
| <b>sTNFR2</b>                                  | 5434.61±1836.53            | 9997.32±4738.43*            | 9761.44±6254.79*            | <0.01          |
| <b>TGF<math>\alpha</math></b>                  | 3.42/0–11.09               | 3.84/0–38.37                | 5.11/0–17.73                | NS             |
| <b>IFN<math>\alpha</math></b>                  | 20.15/14.83 – 69.73        | 39.93/16.41 – 166.58*       | 42.67/24.66 – 132.68*       | <0.01          |
| <b>IFN<math>\gamma</math></b>                  | 8.79/5.81 – 40.73          | 14.31/6.90 – 155.96*        | 17.97/5.31 – 198.54*        | <0.01          |
| <b>IP10</b>                                    | 168.49/48.16 – 621.48      | 532.99/199.27 – 1642.00*    | 372.38/128.66 – 3729.00*    | <0.01          |
| <b>MIP1<math>\alpha</math></b>                 | 10.13/4.69 – 39.15         | 11.09/4.33 – 119.89♦        | 22.12/10.92 – 193.19*¶      | <0.01          |
| <b>MIP1<math>\beta</math></b>                  | 16.26/6.34 – 42.36         | 23.74/8.58 – 146.82*        | 26.38/12.00 – 88.63*        | <0.01          |
| <b>MIP1<math>\Delta</math></b>                 | 3649.00/774.24–18757       | 3796.00/543.59–10174        | 3429.00/196.72–19369        | NS             |
| <b>Eotaxin-1</b>                               | 21.05/14.31 – 626.10       | 417.27/22.15 – 1546.00*     | 341.92/39.13 – 1340.00*     | <0.01          |
| <b>Eotaxin-2</b>                               | 763.87/155.49 – 5681.00    | 242.06/46.82 – 1463.00*     | 236.07/81.46 – 2108.00*     | <0.01          |
| <b>Eotaxin-3</b>                               | 52.47/0–159.78             | 58.83/0–179.88              | 57.05/26.78–196.30          | NS             |
| <b>BCA-1</b>                                   | 11.97/5.65 – 54.49         | 25.34/14.03 – 2210.00*      | 38.00/18.63 – 309.40*       | <0.01          |
| <b>CTACK</b>                                   | 243.16/51.19 – 1123.00     | 608.99/208.13 – 976.66*     | 694.43/287.05 – 1304.00*    | <0.01          |
| <b>RANTES</b>                                  | 14206.96±4453.02           | 8845.67±2569.96*            | 9127.13±3743.69*            | <0.01          |
| <b>TRAIL</b>                                   | 53.40±22.86                | 64.47±22.19                 | 55.44±21.97                 | NS             |
| <b>FGF</b>                                     | 64.98/51.31 – 142.43       | 81.78/60.28 – 1147.00*      | 86.43/60.83 – 317.37*       | <0.01          |
| <b>G-CSF</b>                                   | 58.23/40.37 – 165.64       | 74.64/47.63 – 314.22*       | 67.76/46.24 – 967.36*       | <0.01          |
| <b>EGF</b>                                     | 86.23/20.27 – 878.41       | 41.94/18.01 – 243.74*       | 40.29/17.84 – 227.78*       | <0.01          |
| <b>GM-CSF</b>                                  | 17.59/11.92–44.56          | 19.83/14.61–142.31          | 15.53/8.34–104.87           | NS             |
| <b>PDGF-AA</b>                                 | 1836.50/282.16–5825        | 1539.00/539.50–4268         | 1273.50/134.45–4527         | NS             |

| <b>Cytokines<sup>a</sup></b><br><b>(pg/mL)</b>     | <b>HC</b><br><b>(n=30)</b>    | <b>iBD</b><br><b>(n=31)</b>     | <b>aBD</b><br><b>(n=30)</b> | <b>p-value</b> |
|----------------------------------------------------|-------------------------------|---------------------------------|-----------------------------|----------------|
| <b>PDGF-AB/BB</b>                                  | 8290.40/2194–17759            | 8974.00/1340–20905              | 9372.00/1150–21857          | NS             |
| <b>SCF</b>                                         | 34.85/23.74–75.72             | 42.66/28.19–153.67              | 40.56/22.04–77.87           | NS             |
| <b>VEGF</b>                                        | 205.17/134.60–440.13          | 207.61/148.52–1923.00           | 213.72/131.10–3376.00       | NS             |
| <b>sVEGFR1</b>                                     | 336.22/96.03 – 862.13         | 1724.85/0.00 – 4154.77*         | 1857.94/99.30 – 3740.25*    | <0.01          |
| <b>sVEGFR2</b>                                     | 19676.71/13388.11 – 27752.86¶ | 26774.39/15764.65 – 104368.35*♦ | 21205.25/8240.85– 98000.73¶ | <0.01          |
| <b>sVEGFR3</b>                                     | 194.62/29.73 – 1173.59        | 588.47/0.00 – 3385.05*          | 609.44/20.03 – 2671.95*     | <0.01          |
| <b>Thrombopoietin</b>                              | 418.24/227.48–882.36          | 347.28/242.92–8237.00           | 406.43/222.13–2778.00       | NS             |
| <b>TSLP</b>                                        | 2.98/0–24.83                  | 0/0–68.05                       | 4.29/0–36.43                | NS             |
| <b>LIF</b>                                         | 9.16/4.68–26.63               | 7.54/0–46.49♦                   | 12.59/7.58–27.43¶           | <0.01          |
| <b>SDF-1<math>\alpha</math>+<math>\beta</math></b> | 1634.12 $\pm$ 592.77¶         | 3225.83 $\pm$ 923.98*♦          | 1383.92 $\pm$ 787.63¶       | <0.01          |
| <b><math>\alpha</math>-GRO</b>                     | 653.29/221.74–3966.00         | 594.85/215.69–1417.00           | 733.83/203.56–3747.00       | NS             |
| <b>MCP-1</b>                                       | 360.26 $\pm$ 283.32           | 384.42 $\pm$ 158.58             | 351.65 $\pm$ 258.39         | NS             |
| <b>MCP-2</b>                                       | 24.63/13.10–68.63             | 24.98/16.98–45.63               | 25.03/14.99–88.91           | NS             |
| <b>MCP-3</b>                                       | 21.41/15.60–78.73             | 26.07/17.54–128.04              | 27.57/18.42–67.26           | NS             |
| <b>MCP4</b>                                        | 47.02/28.91–110.76¶           | 116.87/35.10–279.25*♦           | 47.94/25.09–314.91¶         | <0.01          |
| <b>Fractalkine</b>                                 | 59.15/41.68–198.57♦           | 58.94/45.90–302.91♦             | 127.07/56.35–402.24*¶       | <0.01          |
| <b>Flt-3L</b>                                      | 55.89/29.63–87.37             | 54.73/31.08–459.33              | 43.68/31.08–141.78          | NS             |
| <b>ENA-78</b>                                      | 468.77/88.65–4921.00          | 471.47/105.78–2515.00           | 446.81/54.94–8428.00        | NS             |
| <b>TARC</b>                                        | 26.89/3.25–278.16             | 24.93/4.49–111.62               | 16.16/4.25–388.75           | NS             |
| <b>6CKine</b>                                      | 363.59/225.31–1065.00¶        | 546.74/247.26–976.26*♦          | 342.75/262.83–729.32¶       | <0.01          |
| <b>CCL1</b>                                        | 4.91/4.10–12.72               | 5.48/3.59–34.86                 | 5.53/4.29–11.65             | NS             |
| <b>CCL22</b>                                       | 643.34 $\pm$ 273.73           | 561.68 $\pm$ 204.79             | 511.75 $\pm$ 345.07         | NS             |
| <b>sCD30</b>                                       | 17.49/0 – 99.00¶              | 371.89/30.16 – 993.99*♦         | 22.87/7.61 – 218.44¶        | <0.01          |
| <b>sgp130</b>                                      | 78160/42801 – 100000¶         | 274510/46460–1210000*♦          | 78518.83/0 – 100000¶        | <0.01          |
| <b>sRAGE</b>                                       | 237.62/32.12 – 788.06         | 1388.95/145.39 – 6253.66*       | 1474.33/187.76 – 3950.32*   | <0.01          |

**Legend:** 6CKine: chemokine with 6 cysteines;  $\alpha$ -GRO:  $\alpha$ -oncogene related growth; BCA-1: B-cell chemokine attracting 1; CTACK: cutaneous T-cell attracting chemokine; EGF:

epidermal growth factor; ENA-78: epithelial neutrophil activating peptide 78; FGF: fibroblast growth factor; Flt-3L: FMS-like tyrosine kinase 3 ligand; G-CSF: granulocytes colonies stimulating factor; IL1Ra: IL1 receptor antagonist; IP10: IFN $\gamma$ -induced protein 10; LIF: leukemia inhibitor factor; MCP: monocyte chemotactic protein; MIP1: macrophage inflammatory protein 1; PDGF: platelet-derived growth factor; RANTES: regulated on activation, normal T cell expressed and secreted; SCF: stem cell factor; SDF-1 $\alpha$ + $\beta$ : stromal cell-derived factor 1 $\alpha$  and 1 $\beta$ ; sIL1-R: soluble IL1 receptor; sIL2-R $\alpha$ : soluble IL2 receptor  $\alpha$ ; sIL4-R: soluble IL4 receptor; sIL6-R: soluble IL6 receptor; sgp130: soluble glycoprotein 130; sRAGE: soluble receptor of advanced glycosylation end product; sTNFR: soluble TNF receptor; sVEGFR: soluble vascular endothelial growth factor receptor; TARC: thymus and activation-related chemokine; TNF: tumor necrosis factor; IFN: interferon; TRAIL: TNF-related apoptosis-inducing ligand; TSLP: thymic stromal lymphopoietin.

<sup>a</sup> Data are expressed as median/minimum-maximum or mean $\pm$ standard-deviation, according to normality.

Statistical analysis: Kruskal-Wallis test (post-test: Mann-Whitney) or one-way ANOVA (post-test: Buonferroni) when appropriated.

\* p<0.05 compared to HC.

¶ p<0.05 compared to iBD.

◆ p<0.05 compared to aBD.
