# Supplementary material for: Soluble CD40L is associated with increased oxidative burst and neutrophil extracellular trap release in Behçet’s disease
Source: Springer Nature journal article supplement (doi:10.1186/s13075-017-1443-5), 2017-10-19
Supplement: MOESM3 [file 15147012]

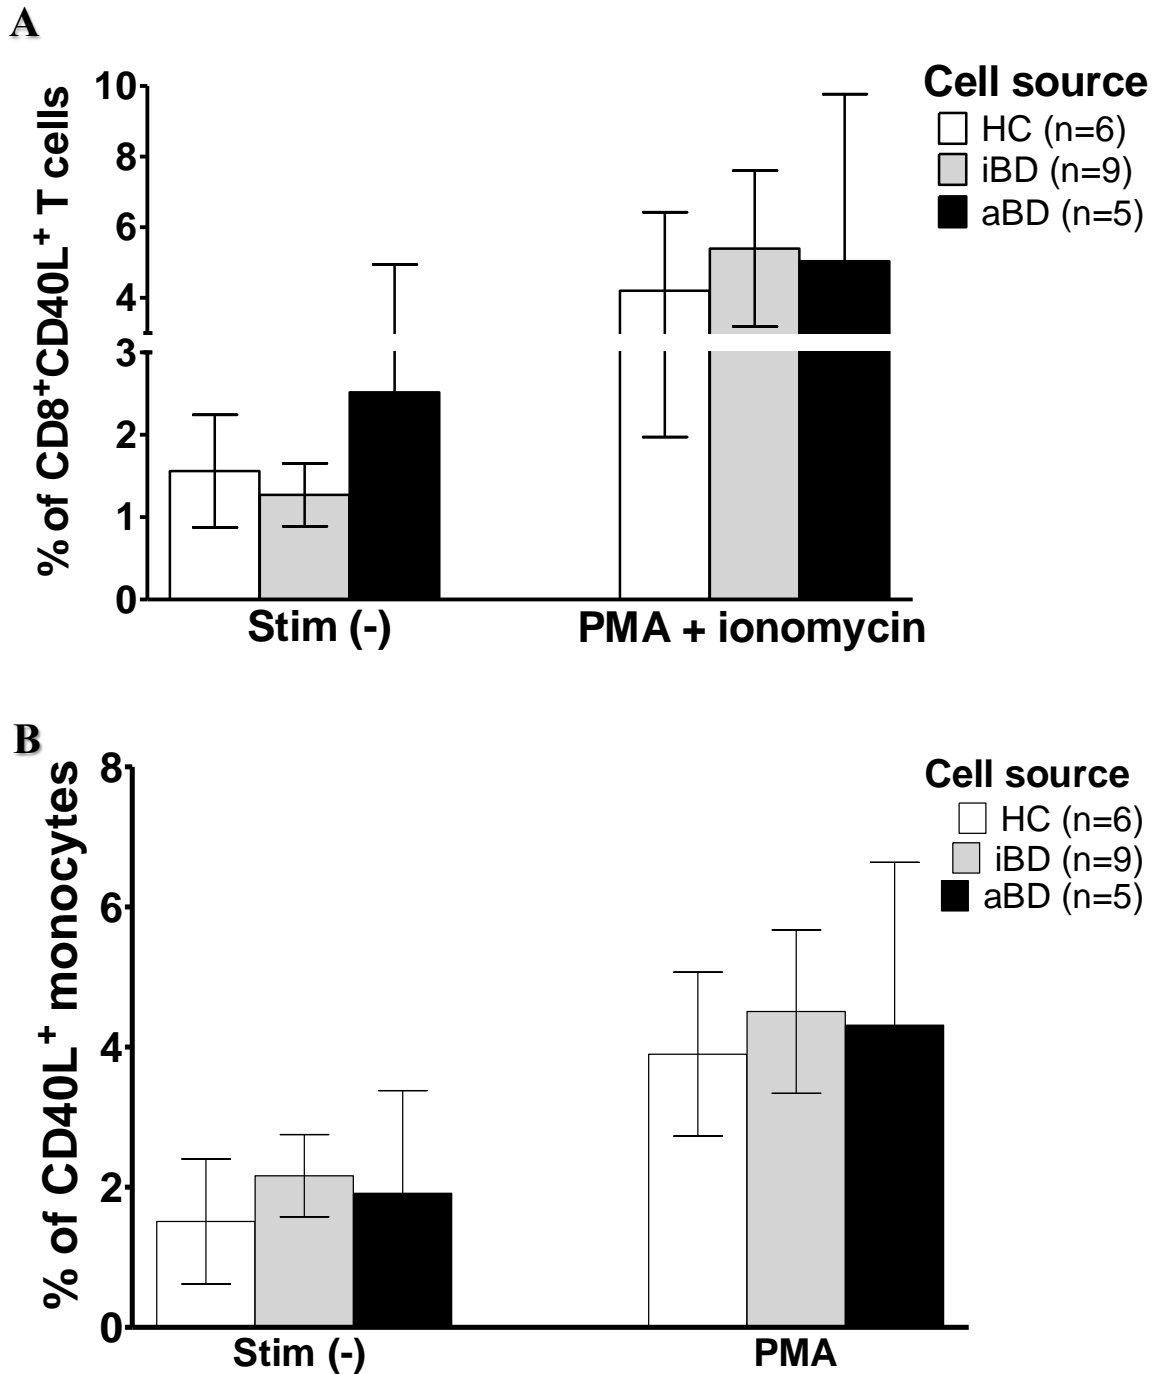

**Figure S1 – CD40L expression is similar on monocytes and CD8<sup>+</sup> T cells from Behçet’s disease patients.** Percentages of CD8<sup>+</sup>CD40L<sup>+</sup> T cells (A) and CD40L<sup>+</sup> monocytes (B) were determined under basal conditions and after 3h stimulus with 1.5 $\mu$ M ionomycin and/or 25ng/mL PMA by flow cytometry in healthy controls (HC), inactive (iBD) and active Behçet’s disease (aBD) patients. No difference in CD40L<sup>+</sup> surface expression was observed.
